# Supplementary material
Source: publisher site journal article supplement (https://www.dovepress.com/article/550326)
Supplement: Supplementary file 1 [file 550326%20Supplementary%20Material.pdf]

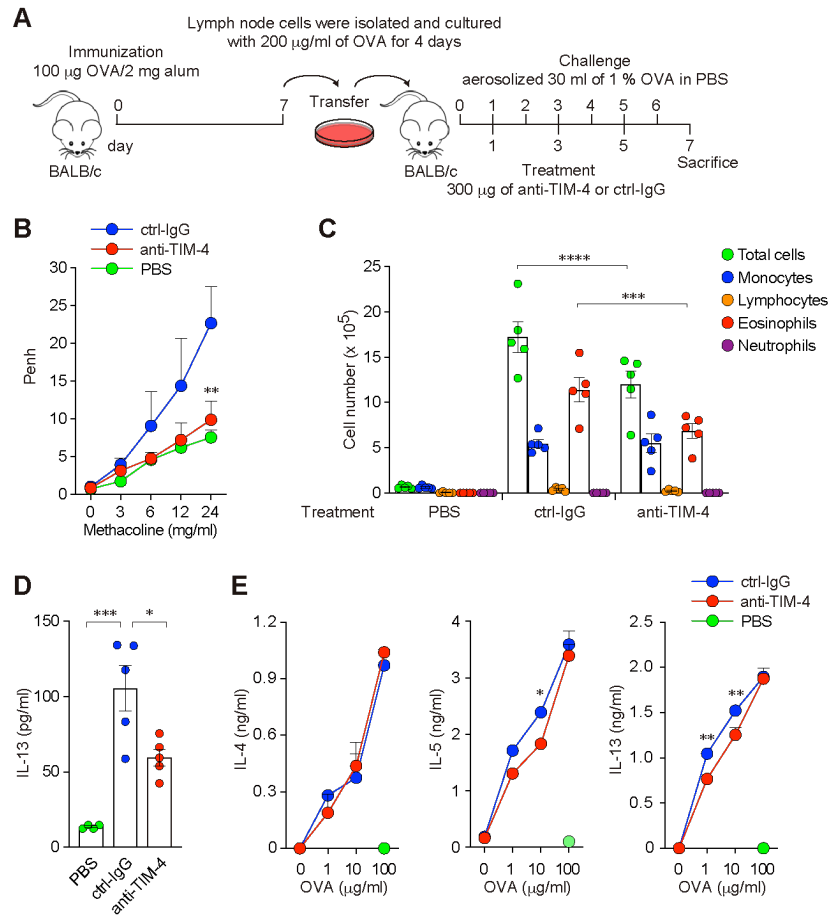

**Supplementary Figure 1.** Inhibitory effect of anti-TIM-4 monoclonal antibody (mAb) on adoptively transferred asthma.

**A**, Lymph node cells from Ovalbumin (OVA)-immunized mice were cultured with OVA *in vitro*, and then  $2 \times 10^6$  cells were intravenously injected into naïve mice and challenged with an OVA/PBS aerosol. Groups of mice were intraperitoneally injected with anti-TIM-4 mAb (RMT4-53), ctrl-IgG (RTG2b), or PBS ( $n = 5$ ). **B**, Individual mice were assessed for airway hyperreactivity. **C**, Bronchoalveolar lavage (BAL) fluid was collected from individual mice, and the cellular composition of the airway infiltrates is shown. **D**, IL-13 levels in BAL fluid were determined by ELISA. **E**, Bronchial lymph node cells were isolated and cultured with the OVA. Cytokine levels in the culture supernatants at 72 h were determined by ELISA. Data are presented as the means  $\pm$  SEM. Statistics: two-way ANOVA with Bonferroni's multiple comparisons test (**B** and **E**) and with Tukey's multiple comparison test (**C**), and one-way ANOVA with Tukey's multiple comparison test (**D**). \* $P < 0.05$ , \*\* $P < 0.01$ , \*\*\* $P < 0.001$  and \*\*\*\* $P < 0.0001$ .

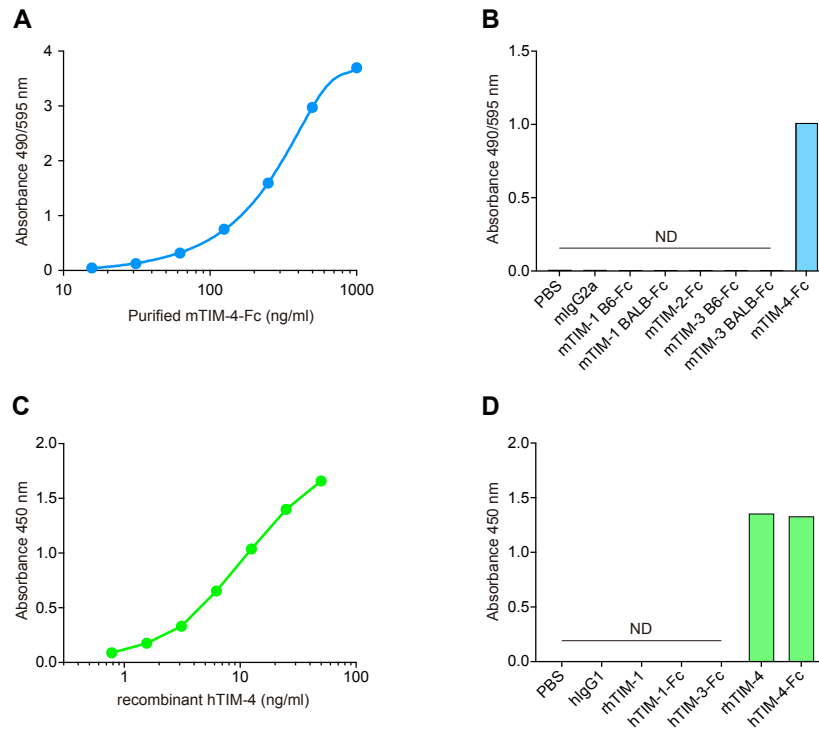

**Supplementary Figure 2. Establishment of ELISA for sTIM-4.**

**A** and **B**, ELISA plates were coated with 10  $\mu$ g/ml anti-mTIM-4 mAb (RMT4-26) and then blocked with 1% BSA in PBS. Serially diluted purified mTIM-4-Fc (**A**) or 100 ng/ml mouse IgG2a (mIgG2a), mTIM-1 B6-Fc, mTIM-1 BALB-Fc, mTIM-2-Fc, mTIM-3 B6-Fc, mTIM-3 BALB-Fc, or mTIM-4-Fc (**B**) were added to each well. After washing, wells were incubated with biotin-conjugated anti-mTIM-4 mAb (RMT4-30), washed, and then developed using a Vectastain ABC kit and o-phenylenediamine. Absorbance at 490/595 nm was measured using a microplate reader.

**C** and **D**, ELISA plates were coated with 10  $\mu$ g/ml anti-hTIM-4 mAb (RHT4-89) and then blocked with 1% BSA in PBS. Serially diluted purified recombinant hTIM-4 (**C**) or 50 ng/ml human IgG1 (hIgG1), rhTIM-1, hTIM-1-Fc, hTIM-3-Fc, rhTIM-4, or hTIM-4-Fc (**D**) were added to each well. After washing, wells were incubated with HRP-labeled anti-hTIM-4 mAb (RHT4-62), washed, and then developed using tetramethylbenzidine. Absorbance at 450 nm was measured using a microplate reader. We defined 1 ng of mTIM-4-Fc or rhTIM-4 as 1 unit of sTIM-4. ND, not detected.

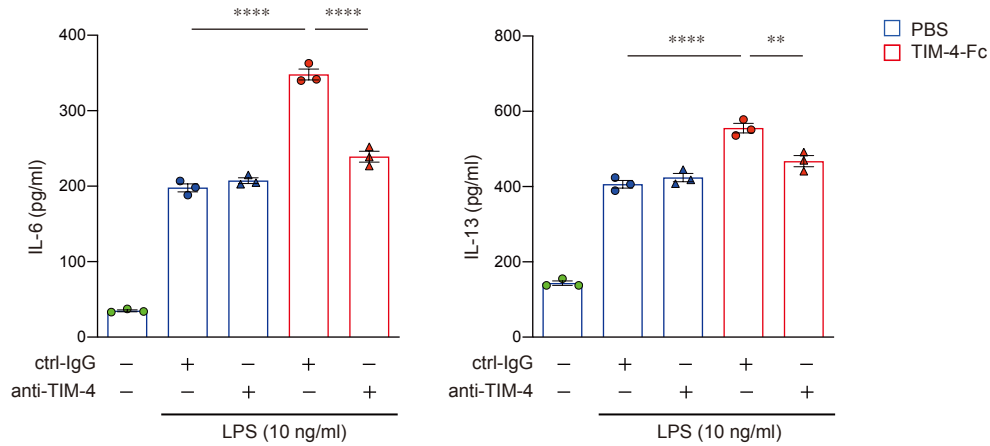

**Supplementary Figure 3.** TIM-4-Fc enhances cytokine production by Lipopolysaccharide (LPS)-stimulated Bone marrow-derived mast cells (BMMCs).

Purified BMMCs were cultured with LPS (O111:B4 *E. coli*) and TIM-4-Fc in the presence of anti-TIM-4 mAb (RMT4-53) or ctrl-IgG (RTG2b). IL-6 and IL-13 in culture supernatants at 6 h were measured by ELISA. Data are representative of two independent experiments. Data are presented as the means  $\pm$  SEM. Statistics: one-way ANOVA with Tukey's multiple comparison test.  $**P < 0.01$  and  $****P < 0.0001$ .

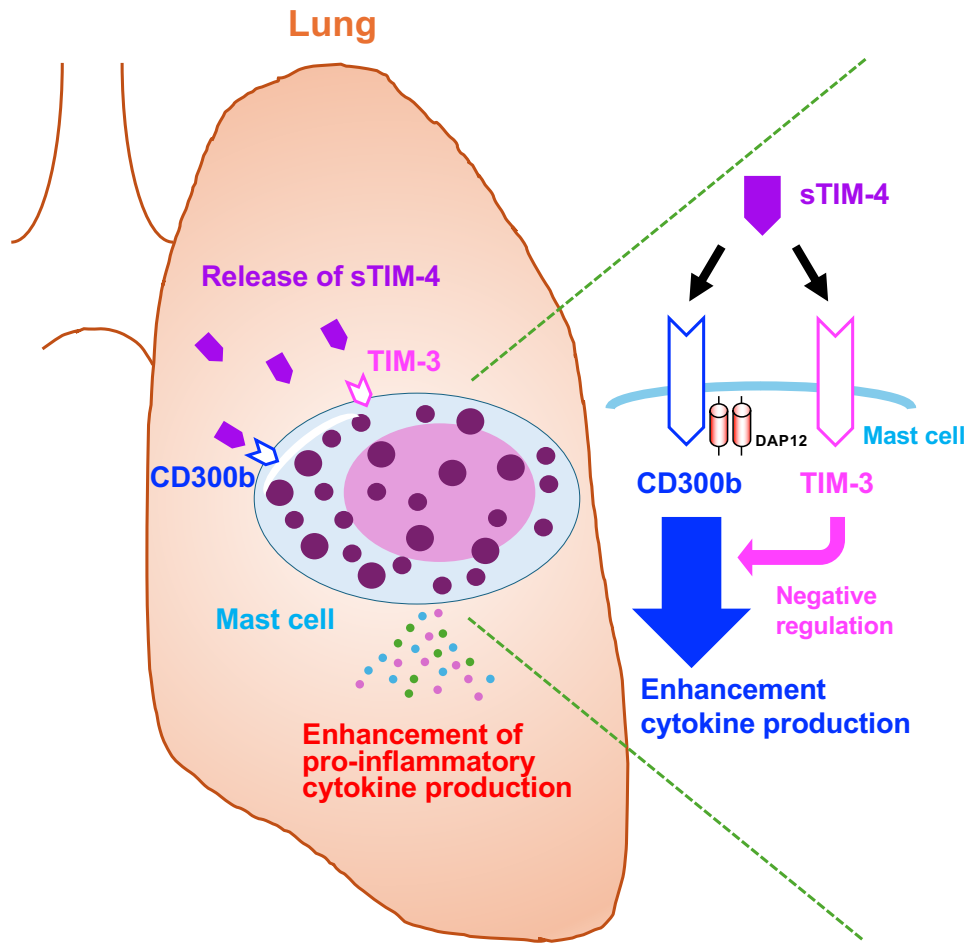

**Supplementary Figure 4.** Graphic summary of the study.

TIM-4 promotes allergic inflammation, and its soluble form (sTIM-4) correlates with disease severity in airway allergy. The interaction between TIM-4 and TIM-3 inhibited CD300b-mediated cytokine production by mast cells; however, TIM-4–CD300b appeared to be the dominant signaling pathway of cytokine production by mast cells.

Supplementary Table 1. Characteristics of patients with asthma

|                                             | n = 124                                   |
|---------------------------------------------|-------------------------------------------|
| Sex (M/F), n (%)                            | 42 (33.9)/ 82(66.1)                       |
| Age (y)                                     | 53.95 ± 15.99                             |
| Age at asthma onset (y)                     | 35.54 ± 21.92                             |
| Duration of asthma (y)                      | 18.41 ± 15.71                             |
| BMI (kg/m <sup>2</sup> )                    | 24.02 ± 4.91                              |
| GINA step 1/2/3/4/5, n (%)                  | 3(2.4)/10(8.0)/32(25.8)/56(45.2)/23(18.6) |
| Smoking history (never/ex/current), n (%)   | 77(62.1)/42(33.9)/5(4)                    |
| Pack year smoking history (pack year)       | 5.71 ± 10.85                              |
| AERD, n (%)                                 | 12 (9.7)                                  |
| Atopic dermatitis, n (%)                    | 26 (21.0)                                 |
| Allergic rhinitis, n (%)                    | 64 (51.6)                                 |
| Chronic sinusitis, n (%)                    | 38 (30.6)                                 |
| Daily dose of ICS (FP equivalent dose, µg)  | 577.4 ± 383.88                            |
| Daily dose of OCS (PSL equivalent dose, mg) | 0.35 ± 1.42                               |
| ACT score, n = 123                          | 23.19 ± 2.84                              |
| FeNO (ppb)                                  | 55.22 ± 44.01                             |
| Peripheral neutrophils (cells/µL)           | 4020.26 ± 1504.34                         |
| Peripheral eosinophils (cells/µL)           | 261.84 ± 237.57                           |
| Serum IgE (IU/ mL)                          | 608.81 ± 1698.66                          |
| FVC (L)                                     | 3.21 ± 0.95                               |
| %FVC (predicted, %)                         | 102.97 ± 16.26                            |
| FEV <sub>1</sub> (L)                        | 2.38 ± 0.79                               |
| %FEV <sub>1</sub> (predicted, %)            | 91.02 ± 18.51                             |
| FEV <sub>1</sub> /FVC ratio (%)             | 73.53 ± 10.33                             |
| PEF (L/sec)                                 | 7.22 ± 2.05                               |
| %PEF (predicted, %)                         | 103.32 ± 21.25                            |
| V50 (L/sec)                                 | 2.53 ± 1.31                               |
| V25 (L/sec)                                 | 0.73 ± 0.50                               |
| V50/V25                                     | 3.99 ± 1.38                               |
| MMF (L)                                     | 1.95 ± 1.07                               |
| %MMF (predicted, %)                         | 59.12 ± 27.63                             |

Data are presented as the mean ± standard deviation unless otherwise indicated.

Abbreviations for all tables: ACT, asthma control test; AERD, aspirin-exacerbated respiratory disease; BMI, body mass index; FeNO, fractional exhaled nitric oxide; FEV<sub>1</sub>, forced expiratory volume in 1 second; FP, fluticasone propionate; FVC, forced vital capacity; GINA, Global Initiative for Asthma; ICS, inhaled corticosteroid; IgE, immunoglobulin E; MMF, mid-maximal flow rate; OCS, oral corticosteroids; PEF, peak expiratory flow; PSL, prednisolone; V25 and V50 = maximal flow rate of expiration at 25% and 50% of forced vital capacity .

## 1 **Supplementary Methods**

### 2 **Cells**

3 Bone marrow-derived mast cells (BMMCs) were generated from femoral bone marrow cells of  
4 C57BL/6, *Cd300lb<sup>-/-</sup>*, or *Tim3<sup>-/-</sup>* mice, as described previously.<sup>1</sup> Bone marrow cells were incubated  
5 for 4–6 weeks in RPMI1640 (Sigma–Aldrich, St. Louis, USA) containing 10% fetal bovine serum  
6 (FBS; Biosera, Nuaille, France), 0.1 mg/ml penicillin and streptomycin, 100 µM 2-mercaptoethanol,  
7 10 mM sodium pyruvate, 10 µM minimum essential medium nonessential amino acids solution  
8 (Invitrogen, Thermo Fisher Scientific, Waltham, MA, USA), 10 mM HEPES, 10 ng/ml recombinant  
9 murine IL-3, and 10 ng/ml recombinant stem cell factor (Wako Pure Chemical Industries, Osaka,  
10 Japan). Flow cytometric analysis identified more than 95% of cells as mast cells (KIT<sup>+</sup> FcεRI<sup>+</sup>).  
11 Murine T lymphoma cell line L5178Y was purchased from American Type Culture Collection  
12 (Manassas, VA, USA). A normal rat kidney cell line NRK-52E was provided by Dr. T. Otsuka  
13 (Institute of Cytosignal Research, Tokyo, Japan). Mouse TIM-4-transfected cells (TIM-4/L5178Y  
14 and TIM-4/NRK) were previously generated.<sup>2</sup> A cDNA fragment encoding the entire open reading  
15 frame of human *TIM4* molecule was prepared by RT-PCR using a cDNA clone (AK301337) from  
16 the NITE Biological Resource Center (National Institute of Technology and Evaluation, Kisarazu,  
17 Japan). The PCR product was cloned into pMKITneo vector and transfected into human leukemic  
18 K562 cells (TIM-4/K562) by electroporation. Mock-transfected cells (mock/K562) were also  
19 produced by electroporation of the pMKITneo vector without an insert. Cells were maintained in  
20 RPMI1640 supplemented with 10% FBS, 0.1 mg/ml penicillin and streptomycin, 2 mM L-glutamine,  
21 10 mM HEPES, and 50 µM 2-mercaptoethanol. The human mast cell leukemia cell line, LAD2,  
22 which was provided by A. Kirshenbaum (National Institute of Allergy and Infectious Diseases,  
23 National Institutes of Health, Bethesda, MD, USA), was maintained in StemPro-34 SFM (Gibco,  
24 Thermo Fisher Scientific, Waltham, MA, USA) in the presence of recombinant human stem cell  
25 factor (PeproTech, Rocky Hill, NJ, USA), as described previously.<sup>3</sup>

26

### 27 **Antibodies and Fc fusion proteins**

28 Expression vectors for mouse TIM-1 C57BL/6 (B6)-Fc, TIM-1 BALB/c (BALB)-Fc, TIM-2-Fc, TIM-3  
29 B6-Fc, TIM-3 BALB-Fc, and TIM-4-Fc were generated by linking the sequence encoding the  
30 extracellular domain of each TIM molecule with that encoding the Fc portion of mouse IgG2a by  
31 inserting them into the pcDNA3.1(-) vector (Invitrogen, Thermo Fisher Scientific, Waltham, MA,  
32 USA), as described previously.<sup>4</sup> The expression vector for mouse PD-L2-Fc was prepared as  
33 described previously.<sup>5</sup> All Fc fusion proteins were produced by transfection of CHO cells using  
34 FuGENE HD Transfection Reagent (Promega Corporation, Madison, WI, USA) and purified using  
35 Protein G-Sepharose (GE Healthcare, Chicago, IL, USA). A sandwich ELISA that detects the Fc  
36 domain of mouse IgG2a using an anti-mouse IgG2a mAb (R11-89) and biotinylated anti-mouse  
37 IgG2a (R19-15) was used to determine the concentration of Fc fusion protein. Monoclonal  
38 antibodies against mouse TIM-1 (RMT1-17), TIM-2 (RMT2-26), and TIM-3 (RMT3-23) were  
39 prepared as described previously.<sup>6</sup> Anti-mouse TIM-4 mAbs (RMT4-26, rat IgG2a/λ; RMT4-30, rat  
40 IgG2a/κ; RMT4-53, rat IgG2b/κ) were generated by immunizing Sprague Dawley rats with TIM-4-  
41 Fc protein. Control rat anti-TNP IgG2a mAb (RTG2a) and rat anti-TNP IgG2b mAb (RTG2b) were  
42 generated in our laboratory. The expression vector for CD300b-Fc comprising the extracellular  
43 domain of mouse CD300b and the Fc portion of human IgG1 was prepared as described  
44 previously.<sup>7</sup> The concentrations of CD300b-Fc were measured using a Human IgG ELISA  
45 Quantitation Kit (Bethyl Laboratories, Montgomery, TX, USA).

46 Recombinant human (rh) TIM-1, hTIM-1-Fc, hTIM-3-Fc, rhTIM-4, and hTIM-4-Fc were  
47 purchased from R&D Systems. The anti-human TIM-4 mAbs were generated by immunizing  
48 Sprague Dawley rats with rhTIM-4 emulsified in complete Freund's adjuvant (Difco Laboratories,  
49 Detroit, MI, USA). Three days after the final immunization, lymph node cells were fused with P3U1  
50 myeloma cells. After hypoxanthine-aminopterin-thymidine selection, hybridomas producing anti-  
51 TIM-4 mAbs (RHT4-89, rat IgG2b/κ; RHT4-62, rat IgG2a/κ) were selected by their reactivity to  
52 human TIM-4-transfected cells, but not to parental cells, by flow cytometry and then cloned by  
53 limiting dilution.

54

55 **Analysis of airway hyperreactivity (AHR)**

56 AHR was measured using methacholine (Wako Pure Chemical Industries, Osaka, Japan)-induced  
57 airflow obstruction. Mice were placed into whole-body plethysmographs (Buxco Research Systems,  
58 Wilmington, NC, USA) interfaced with computers through differential pressure transducers. Airway  
59 resistance is expressed as follows:  $Penh = [(Te/0.3Tr)-1] \times [2Pef/3Pif]$ , where Penh = enhanced  
60 pause, Te = expiratory time (s), Tr = relaxation time (s), Pef = peak expiratory flow (ml), and Pif =  
61 peak inspiratory flow (ml/s). Increasing doses of methacholine were administered for 3 min using a  
62 nebulizer, and Penh values were calculated over the subsequent 5 min.

63

#### 64 **Stimulation of bronchial lymph node cells in vitro**

65 Bronchial lymph node cells ( $6 \times 10^5$  cells/well) were cultured in RPMI1640 medium containing 10%  
66 FBS, 10 mM HEPES, 2 mM L-glutamine, 0.1 mg/ml penicillin and streptomycin, and 50  $\mu$ M 2-  
67 mercaptoethanol in the presence or absence of the indicated doses of OVA. To determine the  
68 production of cytokines, cell-free supernatants were collected after 72 h and assayed for IL-4, IL5,  
69 IFN- $\gamma$ , and IL-13 using ELISA kits.

70

#### 71 **Immunoprecipitation and western blotting**

72 The culture supernatants of TIM-4/L5178Y or L5178Y cells were collected after incubation with or  
73 without 10  $\mu$ M BB-94 (batimastat; Abcam, Cambridge, UK) or 0.1% DMSO for 24 h ( $5 \times 10^6$  cells/5  
74 ml). The cells were lysed in lysis buffer (1% Nonidet P-40, 0.5% sodium deoxycholate, 50 mM Tris-  
75 HCl, 150 mM NaCl, pH 7.6) containing 1 mg/ml aprotinin, 1 mg/ml leupeptin, 1 mg/ml pepstatin A,  
76 and 1 mM phenylmethylsulfonyl fluoride. The cleared lysates or culture supernatants were  
77 incubated with anti-TIM-4 mAb (RMT4-26) or control IgG (RTG2a)-protein G-Sepharose. The  
78 beads were washed with the lysis buffer, and bound proteins were eluted with 1% SDS sample  
79 buffer, subjected to 14% SDS-PAGE under reducing conditions, and blotted onto polyvinylidene  
80 difluoride membrane (Millipore, Burlington, MA, USA). The proteins on the blots were detected  
81 using biotinylated anti-TIM-4 polyclonal Ab (R&D Systems, Minneapolis, MN, USA), Vectastain  
82 ABC Kit (Vector Laboratories, Burlingame, CA, USA), and SuperSignal West Dura

83 Chemiluminescent Substrate (Thermo Fisher Scientific, Waltham, MA, USA). The images were  
84 acquired using the ImageQuant LAS-4000 (Fujifilm Corporation, Tokyo, Japan).

85 The culture supernatants of TIM-4/K562 or mock/K562 cells were collected after incubation with  
86 or without 10  $\mu$ M BB-94 or 0.1% DMSO for 24 h ( $5 \times 10^6$  cells/5 ml). The cells were lysed in RIPA  
87 buffer (Nacalai Tesque, Kyoto, Japan) and cleared lysates or culture supernatants were incubated  
88 with anti-TIM-4 mAb (RHT4-89) or control IgG (RTG2b)-protein G-Sepharose. The beads were  
89 washed with RIPA buffer, and bound proteins were eluted with 1% SDS sample buffer, subjected  
90 to 14% SDS-PAGE under reducing conditions, and blotted onto polyvinylidene difluoride  
91 membrane. The proteins on the blots were detected using horseradish peroxidase (HRP) labeled-  
92 anti-TIM-4 (RHT4-62) and SuperSignal West Dura Chemiluminescent Substrate. Images were  
93 acquired using the ImageQuant LAS-4000.

94

#### 95 **Analysis of sTIM-4**

96 The culture supernatants of TIM-4/L5178Y ( $1 \times 10^6$  cells), L5178Y cells, TIM-4/NRK ( $5 \times 10^4$  cells),  
97 NRK cells, or peritoneal macrophages ( $3 \times 10^5$  cells) were collected after treatment with 10  $\mu$ M BB-  
98 94 or 0.1% DMSO for 24 h. BAL fluids or sera were collected from naïve mice or mice sensitized  
99 and challenged with OVA as described below. The concentrations of sTIM-4 in the culture  
100 supernatants, BAL fluids, or sera were measured by ELISA. Immulon 2 HB 96-well microtiter plates  
101 (Thermo Fisher Scientific, Waltham, MA, USA) were coated with 10  $\mu$ g/ml anti-TIM-4 mAb (RMT4-  
102 26) and incubated at 4°C overnight. Wells were then blocked with 1% BSA in PBS for 1 h at room  
103 temperature. Serially diluted samples were added to each well followed by incubation for 2 h at  
104 room temperature. After washing with 0.05% Tween 20 in PBS, the wells were incubated with  
105 biotin-conjugated anti-TIM-4 mAb (RMT4-30) for 1 h and washed, and the antigen-antibody  
106 complexes were detected using Vectastain ABC kit (Vector Laboratories, Burlingame, CA, USA)  
107 and o-phenylenediamine (Wako Pure Chemical Industries, Osaka, Japan). After terminating the  
108 reaction with 2N H<sub>2</sub>SO<sub>4</sub>, the absorbance at 490/595 nm was measured using a microplate reader  
109 (Bio-Rad Laboratories, Hercules, CA, USA). We defined 1 ng of purified TIM-4-Fc as 1 unit (U) of  
110 sTIM-4.

111 The culture supernatants of TIM-4/K562 ( $1 \times 10^6$  cells) or mock/K562 cells were collected after  
112 treatment with 10  $\mu$ M BB-94 or 0.1% DMSO for 24 h. ELISA plates were coated with 10  $\mu$ g/ml anti-  
113 human TIM-4 mAb (RHT4-89) and incubated at 4°C overnight. The wells were then blocked with  
114 1% BSA in PBS for 1 h at room temperature. Serially diluted purified recombinant hTIM-4 or 50  
115 ng/ml human IgG1 (hIgG1), rhTIM-1, hTIM-1-Fc, hTIM-3-Fc, rhTIM-4, or hTIM-4-Fc were added to  
116 each well, followed by incubation for 2 h at room temperature. After washing with 0.05 % Tween  
117 20 in PBS, the wells were incubated with HRP-labeled anti-human TIM-4 mAb (RHT4-62) for 1 h,  
118 washed again, and then developed using tetramethylbenzidine (Sigma–Aldrich, St. Louis, MO,  
119 USA). After terminating the reaction with 2N H<sub>2</sub>SO<sub>4</sub>, absorbance at 450 nm was measured using a  
120 microplate reader (Bio-Rad Laboratories, Hercules, CA, USA). We defined 1 ng of rhTIM-4 as 1 U  
121 of sTIM-4.

122

### 123 **Analyses of cytokine production**

124 BMMCs ( $5 \times 10^6$ /ml) were sensitized with 100 ng/ml mouse IgE (IgE-3; BD Biosciences, San Jose,  
125 CA, USA) for 1 h at 4°C and then washed. IgE-sensitized cells ( $2 \times 10^6$ /ml) were incubated with an  
126 anti-mouse IgE mAb (R35–72; BD Biosciences) in the presence of TIM-4-Fc, PD-L2-Fc, mouse  
127 IgG2a, anti-TIM-4 mAb (RMT4-53), or control IgG (RTG2b) for 6 h. In some experiments, BMMCs  
128 were incubated for 6 h in culture supernatants obtained from L5178Y or TIM-4/L5178Y cells.  
129 Culture supernatants were assayed for IL-6 using an OptEIA Kit (BD Biosciences) and for IL-13  
130 using a Ready-SET-Go! ELISA Kit (eBioscience, San Diego, CA, USA), respectively, according to  
131 the manufacturers' instructions.

132 The culture supernatants of LAD2 cells ( $1 \times 10^5$  cells) were collected after incubation with culture  
133 supernatants obtained from mock/K562 or TIM-4/K562 cells and anti-TIM-4 mAb (5  $\mu$ g/ml) for 24  
134 h. Culture supernatants were assayed for IL-6 using a Human IL-6 DuoSet ELISA (R&D Systems,  
135 Minneapolis, MN, USA) according to the manufacturers' instructions.

136

### 137 **Degranulation by BMMCs**

138 Degranulation of the BMMCs was measured using the  $\beta$ -hexosaminidase release assay.<sup>8</sup> BMMCs  
139 ( $5 \times 10^6$  cells/ml) were sensitized with 1  $\mu$ g/ml mouse IgE for 1 h at 4°C, washed with Tyrode's  
140 buffer (10 mM HEPES buffer, pH 7.4, 130 mM NaCl, 5 mM KCl, 5.6 mM glucose, 0.1% BSA),  
141 resuspended in Tyrode's buffer containing 1 mM CaCl<sub>2</sub> and 0.6 mM MgCl<sub>2</sub>, and incubated for 40  
142 min at 37°C with anti-mouse IgE in the presence of TIM-4-Fc (10  $\mu$ g/ml) or mouse IgG2a. The  
143 supernatants were collected by centrifugation at 4°C and incubated with 1.3 mg/ml 4-nitrophenyl-  
144 *N*-acetyl- $\beta$ -D-galactopyranoside (Sigma–Aldrich, St. Louis, MO, USA) in 0.1 M sodium citrate buffer  
145 (pH 4.5) for 60 min at 37°C. The reaction was terminated by adding 0.2 M glycine buffer (pH 10.7).  
146 The release of the product 4-*p*-nitrophenol was monitored by optical absorbance at 405 nm. The  
147 percentage of  $\beta$ -hexosaminidase release was calculated as follows: % release = supernatant OD  
148 value of stimulated cells/total cell lysate OD value  $\times$  100. Total cell lysates were prepared using 1%  
149 Triton-X 100.

150

#### 151 **Induction of PCA**

152 Mice were intradermally sensitized with 50 ng anti-DNP IgE (H1-e-26; gifted from T. Kitamura,  
153 University of Tokyo) or PBS, and each ear was treated with 10  $\mu$ g anti-TIM-4 mAb (RMT4-53) or  
154 control IgG (RTG2b). The mice were intravenously injected with 1% Evans blue dye (Sigma–Aldrich,  
155 St. Louis, MO, USA) containing 250  $\mu$ g DNP-HSA (Sigma–Aldrich) 24 h after sensitization. The  
156 amounts of extravasated dye 30 min after antigen challenge were measured from absorbance at  
157 620 nm.

158

#### 159 **Knockdown of mRNA expression using siRNAs**

160 *Cd300lb* siRNA (Stealth RNAi, MSS238415 and MSS238417), *Tim3* siRNA (MSS206431 and  
161 MSS275596), and control siRNA (siRNA negative control, low and medium GC–content duplexes)  
162 were purchased from Invitrogen, Thermo Fisher Scientific (Waltham, MA, USA). A 10  $\mu$ l aliquot of  
163 20  $\mu$ M siRNA was introduced into  $2 \times 10^6$  cells using a Neon 100  $\mu$ l kit with a Neontransfection  
164 System (Invitrogen, Thermo Fisher Scientific) set at 1700 V, 20 msec, and 1 pulse. The  
165 electroporated BMMCs were harvested 72 h after transfection.

166

167 **Real-time PCR analysis of mRNAs**

168 Total RNA was extracted from cells using TRIzol reagents (Invitrogen, Thermo Fisher Scientific,  
169 Waltham, MA, USA) and reverse-transcribed using a ReverTra Ace qPCR RT Kit (TOYOBO, Osaka,  
170 Japan) according to the manufacturer's protocol. The levels of *Cd300b* and *Tim3* mRNA were  
171 quantified using a 7500 FAST Real-Time PCR System (Applied Biosystems, Thermo Fisher  
172 Scientific, Waltham, MA, USA) with TaqMan gene expression assays (Mm01701740\_m1 for  
173 *Cd300b* and Mm00454540\_m1 for *Tim3*; Applied Biosystems, Thermo Fisher Scientific) and  
174 TaqMan Fast Advanced Master Mix (Applied Biosystems, Thermo Fisher Scientific). The mRNA  
175 levels were evaluated as their ratios to those of the housekeeping gene *Gapdh* (4352339E; Applied  
176 Biosystems, Thermo Fisher Scientific) by calculating cycle threshold values in amplification plots  
177 using 7500 SDS software (Applied Biosystems, Thermo Fisher Scientific).

178 **References**

- 179 1. Nakano N, Nishiyama C, Yagita H, Koyanagi A, Ogawa H, Okumura K. Notch1-mediated  
180 signaling induces MHC class II expression through activation of class II transactivator  
181 promoter III in mast cells. *J Biol Chem.* Apr 8 2011;286(14):12042-8.  
182 doi:10.1074/jbc.M110.138966
- 183 2. Kawamoto T, Abe Y, Ito J, et al. Anti-T cell immunoglobulin and mucin domain-2 monoclonal  
184 antibody exacerbates collagen-induced arthritis by stimulating B cells. *Arthritis Res Ther.*  
185 2011;13(2):R47. doi:10.1186/ar3288
- 186 3. Kirshenbaum AS, Akin C, Wu Y, et al. Characterization of novel stem cell factor responsive  
187 human mast cell lines LAD 1 and 2 established from a patient with mast cell  
188 sarcoma/leukemia; activation following aggregation of FcepsilonRI or FcgammaRI. *Leuk Res.*  
189 Aug 2003;27(8):677-82. doi:10.1016/s0145-2126(02)00343-0
- 190 4. Nakayama M, Akiba H, Takeda K, et al. Tim-3 mediates phagocytosis of apoptotic cells and  
191 cross-presentation. *Blood.* Apr 16 2009;113(16):3821-30. doi:10.1182/blood-2008-10-185884
- 192 5. Ansari MJ, Salama AD, Chitnis T, et al. The programmed death-1 (PD-1) pathway regulates  
193 autoimmune diabetes in nonobese diabetic (NOD) mice. *J Exp Med.* Jul 7 2003;198(1):63-9.  
194 doi:10.1084/jem.20022125
- 195 6. Abe Y, Kamachi F, Kawamoto T, et al. TIM-4 has dual function in the induction and effector  
196 phases of murine arthritis. *J Immunol.* Nov 1 2013;191(9):4562-72.  
197 doi:10.4049/jimmunol.1203035
- 198 7. Yamanishi Y, Kitaura J, Izawa K, et al. TIM1 is an endogenous ligand for LMIR5/CD300b:  
199 LMIR5 deficiency ameliorates mouse kidney ischemia/reperfusion injury. *J Exp Med.* Jul 5  
200 2010;207(7):1501-11. doi:10.1084/jem.20090581
- 201 8. Furumoto Y, Hiraoka S, Kawamoto K, et al. Polymorphisms in FcepsilonRI beta chain do not  
202 affect IgE-mediated mast cell activation. *Biochem Biophys Res Commun.* Jul 5  
203 2000;273(2):765-71. doi:10.1006/bbrc.2000.2989
